# Supplementary material for: Some Considerations about Winter Colony Losses in Italy According to the Coloss Questionnaire
Source: MDPI journal article supplement (doi:10.3390/insects13111059), 2022-11-16
Supplement: s1 [file s1]

Supplementary Materials

Table S3: Distribution of losses due to queen-related problems, natural disaster, and dead or empty colonies.

| Region         |                       | 2014-2015   |              |                 |               |                      | 2015-2016   |              |                 |               |                      | 2016-2017   |              |                 |               |                      | 2017-2018   |              |                 |               |                      | 2018-2019   |              |                 |               |                      | 2019-2020   |              |                 |               |                      | 2020-2021   |              |                 |               |                      |
|----------------|-----------------------|-------------|--------------|-----------------|---------------|----------------------|-------------|--------------|-----------------|---------------|----------------------|-------------|--------------|-----------------|---------------|----------------------|-------------|--------------|-----------------|---------------|----------------------|-------------|--------------|-----------------|---------------|----------------------|-------------|--------------|-----------------|---------------|----------------------|-------------|--------------|-----------------|---------------|----------------------|
|                |                       | N. colonies | Lostqproblem | Lostnatdisaster | LostDeadEmpty | N. Lost colonies (%) | N. colonies | Lostqproblem | Lostnatdisaster | LostDeadEmpty | N. Lost colonies (%) | N. colonies | Lostqproblem | Lostnatdisaster | LostDeadEmpty | N. Lost colonies (%) | N. colonies | Lostqproblem | Lostnatdisaster | LostDeadEmpty | N. Lost colonies (%) | N. colonies | Lostqproblem | Lostnatdisaster | LostDeadEmpty | N. Lost colonies (%) | N. colonies | Lostqproblem | Lostnatdisaster | LostDeadEmpty | N. Lost colonies (%) | N. colonies | Lostqproblem | Lostnatdisaster | LostDeadEmpty | N. Lost colonies (%) |
| Emilia Romagna |                       | 27          | 0            | 0               | 0             | 0 (0.0%)             | 145         | 5            | 3               | 17            | 25 (17.2%)           | 1063        | 23           | 0               | 90            | 113 (10.6%)          | 646         | 54           | 2               | 211           | 267 (41.3%)          | 162         | 8            | 0               | 11            | 19 (11.7%)           | 688         | 36           | 12              | 47            | 95 (13.8%)           | 2971        | 135          | 0               | 213           | 348 (11.7%)          |
|                | Friuli Venezia Giulia | 2443        | 143          | 18              | 335           | 496 (20.3%)          | 36          | 4            | 2               | 3             | 9 (25.0%)            | 1134        | 0            | 0               | 153           | 153 (13.5%)          | 22          | 1            | 0               | 6             | 7 (31.8%)            | 104         | 17           | 0               | 21            | 38 (36.5%)           | 400         | 26           | 1               | 56            | 83 (20.8%)           | 1099        | 67           | 46              | 180           | 293 (26.7%)          |
| Lombardia      |                       | 128         | 1            | 0               | 14            | 15 (11.7%)           | 2725        | 170          | 33              | 204           | 407 (14.9%)          | 1867        | 155          | 8               | 306           | 469 (25.1%)          | 1046        | 56           | 0               | 113           | 169 (16.2%)          | 156         | 1            | 0               | 11            | 12 (7.7%)            | 166         | 5            | 0               | 29            | 34 (20.5%)           | 7957        | 368          | 247             | 875           | 1490 (18.7%)         |
|                | Piemonte              | 10          | 0            |                 | 0             | 0 (0.0%)             | 50          | 1            |                 | 4             | 5 (10.0%)            | 193         | 1            | 0               | 26            | 27 (14.0%)           | 664         | 77           | 21              | 79            | 177 (26.7%)          | 479         | 7            | 0               | 27            | 34 (7.1%)            | 648         | 34           | 0               | 145           | 179 (27.6%)          | 1567        | 164          | 5               | 159           | 328 (20.9%)          |
| Sicilia        |                       | 125         | 2            | 9               | 9             | 20 (16.0%)           | 195         | 5            | 5               | 9             | 19 (9.7%)            | 1423        | 110          | 50              | 33            | 193 (13.6%)          | 115         | 10           | 0               | 22            | 32 (27.8%)           | 2582        | 24           | 84              | 104           | 212 (8.2%)           | 290         | 12           | 0               | 38            | 50 (17.2%)           | 6327        | 147          | 84              | 532           | 763 (12.1%)          |
|                | Trentino Alto Adige   | 154         | 4            | 0               | 13            | 17 (11.0%)           | 1266        | 62           | 22              | 76            | 160 (12.6%)          | 321         | 58           | 0               | 91            | 149 (46.4%)          | 566         | 32           | 0               | 86            | 118 (20.8%)          | 936         | 54           | 5               | 114           | 173 (18.5%)          | 1691        | 168          | 10              | 164           | 342 (20.2%)          | 1735        | 137          | 18              | 243           | 398 (22.9%)          |
| Veneto         |                       | 1777        | 85           | 21              | 441           | 547 (30.8%)          | 2686        | 160          | 45              | 163           | 368 (13.7%)          | 2105        | 169          | 24              | 295           | 488 (23.2%)          | 1546        | 126          | 6               | 221           | 353 (22.8%)          | 4037        | 201          | 38              | 474           | 713 (17.7%)          | 1978        | 152          | 8               | 202           | 362 (18.3%)          | 1148        | 112          | 16              | 201           | 329 (28.7%)          |
|                | Total                 | 4664        | 235          | 48              | 812           | 1095 (23.5%)         | 7103        | 407          | 110             | 476           | 993 (14.0%)          | 8106        | 516          | 82              | 994           | 1592 (19.6%)         | 4605        | 356          | 29              | 738           | 1123 (24.4%)         | 8456        | 312          | 127             | 762           | 1201 (14.2%)         | 5861        | 433          | 31              | 681           | 1145 (19.5%)         | 22804       | 1130         | 416             | 2403          | 3949 (17.3%)         |
